# Supplementary material for: Investigation of the photoinduced electron injection processes for p-type triphenylamine-sensitized solar cells
Source: Royal Society of Chemistry journal article supplement (doi:10.1039/c1ee01638e), 2011-01-01
Supplement: c1ee01638e.pdf [file c1ee01638e.pdf]

### Supplementary Informations

## Investigation of the Photoinduced Electron Injection Processes for p-type Triphenylamine-Sensitised Solar Cells

Julien Preat, Anders Hagfeldt, and Eric A. Perpète

### Optimized ICT B3LYP geometry

---

| Center<br>Number | Atomic<br>Number | Atomic<br>Type | Coordinates (Angstroms) |           |           |
|------------------|------------------|----------------|-------------------------|-----------|-----------|
|                  |                  |                | X                       | Y         | Z         |
| 1                | 6                | 0              | -0.002239               | 5.342665  | 0.021778  |
| 2                | 6                | 0              | 0.757248                | 4.643573  | -0.929014 |
| 3                | 6                | 0              | 0.761517                | 3.254157  | -0.937881 |
| 4                | 6                | 0              | -0.001951               | 2.551228  | 0.008812  |
| 5                | 6                | 0              | -0.766270               | 3.244516  | 0.962628  |
| 6                | 6                | 0              | -0.760390               | 4.632427  | 0.964515  |
| 7                | 1                | 0              | 1.336388                | 5.188091  | -1.670198 |
| 8                | 1                | 0              | 1.331843                | 2.709344  | -1.687468 |
| 9                | 7                | 0              | -0.001524               | 1.127253  | 0.002310  |
| 10               | 1                | 0              | -1.336356               | 2.692574  | 1.707151  |
| 11               | 1                | 0              | -1.335571               | 5.181366  | 1.706401  |
| 12               | 6                | 0              | 1.209246                | 0.436388  | -0.149949 |
| 13               | 6                | 0              | 2.397712                | 0.938427  | 0.429543  |
| 14               | 6                | 0              | 3.583925                | 0.248780  | 0.288881  |
| 15               | 6                | 0              | 3.654903                | -0.968652 | -0.440931 |

|    |    |   |           |           |           |
|----|----|---|-----------|-----------|-----------|
| 16 | 6  | 0 | 2.451757  | -1.451608 | -1.026062 |
| 17 | 6  | 0 | 1.259800  | -0.773961 | -0.882499 |
| 18 | 1  | 0 | 2.368157  | 1.853263  | 1.017549  |
| 19 | 1  | 0 | 4.475215  | 0.649780  | 0.769563  |
| 20 | 1  | 0 | 2.465124  | -2.362610 | -1.619894 |
| 21 | 1  | 0 | 0.360374  | -1.149731 | -1.365510 |
| 22 | 6  | 0 | -1.212346 | 0.435348  | 0.150508  |
| 23 | 6  | 0 | -2.400674 | 0.941371  | -0.425685 |
| 24 | 6  | 0 | -3.587495 | 0.252287  | -0.287573 |
| 25 | 6  | 0 | -3.659264 | -0.968444 | 0.436615  |
| 26 | 6  | 0 | -2.456039 | -1.455869 | 1.017848  |
| 27 | 6  | 0 | -1.263420 | -0.778840 | 0.876590  |
| 28 | 1  | 0 | -2.370651 | 1.859326  | -1.008808 |
| 29 | 1  | 0 | -4.478788 | 0.656836  | -0.765264 |
| 30 | 1  | 0 | -2.469862 | -2.369869 | 1.607054  |
| 31 | 1  | 0 | -0.364005 | -1.157993 | 1.356969  |
| 32 | 6  | 0 | -0.032533 | 6.834276  | 0.068261  |
| 33 | 8  | 0 | -0.676474 | 7.469482  | 0.891060  |
| 34 | 8  | 0 | 0.715442  | 7.407148  | -0.880717 |
| 35 | 1  | 0 | 0.636969  | 8.410329  | -0.774006 |
| 36 | 6  | 0 | -4.895199 | -1.693018 | 0.589056  |
| 37 | 6  | 0 | -5.103740 | -2.919644 | 1.234509  |
| 38 | 6  | 0 | -6.424077 | -3.357044 | 1.205602  |
| 39 | 6  | 0 | -7.304985 | -2.486381 | 0.533970  |
| 40 | 16 | 0 | -6.414717 | -1.082861 | -0.066112 |
| 41 | 1  | 0 | -4.302080 | -3.478770 | 1.710376  |
| 42 | 1  | 0 | -6.771189 | -4.286333 | 1.652778  |

|    |    |   |            |           |           |
|----|----|---|------------|-----------|-----------|
| 43 | 6  | 0 | 4.889763   | -1.694775 | -0.594615 |
| 44 | 6  | 0 | 5.096500   | -2.920243 | -1.242838 |
| 45 | 6  | 0 | 6.415889   | -3.360452 | -1.213532 |
| 46 | 6  | 0 | 7.297883   | -2.493194 | -0.538921 |
| 47 | 16 | 0 | 6.409861   | -1.089212 | 0.063473  |
| 48 | 1  | 0 | 4.294143   | -3.476750 | -1.720597 |
| 49 | 1  | 0 | 6.761529   | -4.289489 | -1.662365 |
| 50 | 6  | 0 | 8.673540   | -2.736400 | -0.384665 |
| 51 | 6  | 0 | 9.663036   | -1.979158 | 0.251185  |
| 52 | 1  | 0 | 9.020125   | -3.671331 | -0.838336 |
| 53 | 6  | 0 | -8.681361  | -2.726241 | 0.380811  |
| 54 | 6  | 0 | -9.669884  | -1.965706 | -0.252575 |
| 55 | 1  | 0 | -9.029521  | -3.661204 | 0.833214  |
| 56 | 6  | 0 | -9.446874  | -0.724889 | -0.904633 |
| 57 | 7  | 0 | -9.288023  | 0.297611  | -1.447962 |
| 58 | 6  | 0 | -11.011782 | -2.433952 | -0.268139 |
| 59 | 7  | 0 | -12.114950 | -2.817609 | -0.281504 |
| 60 | 6  | 0 | 11.003811  | -2.450556 | 0.267734  |
| 61 | 7  | 0 | 12.106059  | -2.836828 | 0.281907  |
| 62 | 6  | 0 | 9.442095   | -0.738732 | 0.904669  |
| 63 | 7  | 0 | 9.284937   | 0.283457  | 1.449087  |

-----  
Optimized ICT PBE0 geometry  
-----

| Center<br>Number | Atomic<br>Number | Atomic<br>Type | Coordinates (Angstroms) |   |   |
|------------------|------------------|----------------|-------------------------|---|---|
|                  |                  |                | X                       | Y | Z |

-----

|    |   |   |           |           |           |
|----|---|---|-----------|-----------|-----------|
| 1  | 6 | 0 | -0.000600 | 5.306589  | 0.019440  |
| 2  | 6 | 0 | 0.764718  | 4.610865  | -0.922754 |
| 3  | 6 | 0 | 0.767935  | 3.224657  | -0.931228 |
| 4  | 6 | 0 | -0.001653 | 2.527371  | 0.008330  |
| 5  | 6 | 0 | -0.771502 | 3.216965  | 0.954029  |
| 6  | 6 | 0 | -0.765245 | 4.601742  | 0.954455  |
| 7  | 1 | 0 | 1.350112  | 5.157059  | -1.659464 |
| 8  | 1 | 0 | 1.343282  | 2.676055  | -1.676071 |
| 9  | 7 | 0 | -0.001645 | 1.111192  | 0.002759  |
| 10 | 1 | 0 | -1.347145 | 2.662816  | 1.694509  |
| 11 | 1 | 0 | -1.345774 | 5.154544  | 1.690902  |
| 12 | 6 | 0 | 1.200724  | 0.425391  | -0.149398 |
| 13 | 6 | 0 | 2.390161  | 0.937234  | 0.411562  |
| 14 | 6 | 0 | 3.571965  | 0.247879  | 0.271084  |
| 15 | 6 | 0 | 3.635387  | -0.976246 | -0.441364 |
| 16 | 6 | 0 | 2.432260  | -1.468154 | -1.009323 |
| 17 | 6 | 0 | 1.244319  | -0.791692 | -0.864719 |
| 18 | 1 | 0 | 2.362946  | 1.861211  | 0.987644  |
| 19 | 1 | 0 | 4.468397  | 0.655846  | 0.739028  |
| 20 | 1 | 0 | 2.442658  | -2.387329 | -1.592458 |
| 21 | 1 | 0 | 0.339481  | -1.172340 | -1.336710 |
| 22 | 6 | 0 | -1.204310 | 0.425039  | 0.151404  |
| 23 | 6 | 0 | -2.393544 | 0.941136  | -0.405992 |
| 24 | 6 | 0 | -3.576101 | 0.252604  | -0.267960 |
| 25 | 6 | 0 | -3.640523 | -0.974809 | 0.438661  |
| 26 | 6 | 0 | -2.437472 | -1.471304 | 1.002711  |
| 27 | 6 | 0 | -1.248729 | -0.795727 | 0.860336  |

|    |    |   |           |           |           |
|----|----|---|-----------|-----------|-----------|
| 28 | 1  | 0 | -2.365695 | 1.868180  | -0.977110 |
| 29 | 1  | 0 | -4.472469 | 0.664323  | -0.732733 |
| 30 | 1  | 0 | -2.448515 | -2.393433 | 1.581161  |
| 31 | 1  | 0 | -0.343979 | -1.179928 | 1.329603  |
| 32 | 6  | 0 | -0.030595 | 6.794142  | 0.065153  |
| 33 | 8  | 0 | -0.680218 | 7.423751  | 0.881469  |
| 34 | 8  | 0 | 0.720552  | 7.360652  | -0.871610 |
| 35 | 1  | 0 | 0.643137  | 8.359965  | -0.767322 |
| 36 | 6  | 0 | -4.871418 | -1.696270 | 0.590682  |
| 37 | 6  | 0 | -5.076905 | -2.924609 | 1.230724  |
| 38 | 6  | 0 | -6.394599 | -3.354705 | 1.200565  |
| 39 | 6  | 0 | -7.265522 | -2.474464 | 0.533597  |
| 40 | 16 | 0 | -6.376335 | -1.084914 | -0.052852 |
| 41 | 1  | 0 | -4.273731 | -3.486389 | 1.702922  |
| 42 | 1  | 0 | -6.750019 | -4.284430 | 1.642099  |
| 43 | 6  | 0 | 4.865143  | -1.699224 | -0.594927 |
| 44 | 6  | 0 | 5.068767  | -2.926358 | -1.237912 |
| 45 | 6  | 0 | 6.385560  | -3.359116 | -1.207855 |
| 46 | 6  | 0 | 7.257802  | -2.482183 | -0.538149 |
| 47 | 16 | 0 | 6.370847  | -1.092302 | 0.051074  |
| 48 | 1  | 0 | 4.264785  | -3.485566 | -1.711789 |
| 49 | 1  | 0 | 6.739442  | -4.288533 | -1.651262 |
| 50 | 6  | 0 | 8.631534  | -2.715017 | -0.381209 |
| 51 | 6  | 0 | 9.604550  | -1.945200 | 0.254512  |
| 52 | 1  | 0 | 8.988660  | -3.649331 | -0.830722 |
| 53 | 6  | 0 | -8.639880 | -2.704244 | 0.377135  |
| 54 | 6  | 0 | -9.611710 | -1.931422 | -0.256527 |

|    |   |   |            |           |           |
|----|---|---|------------|-----------|-----------|
| 55 | 1 | 0 | -8.998559  | -3.638676 | 0.825189  |
| 56 | 6 | 0 | -9.365658  | -0.695149 | -0.901345 |
| 57 | 7 | 0 | -9.185096  | 0.324634  | -1.438910 |
| 58 | 6 | 0 | -10.956373 | -2.379461 | -0.281896 |
| 59 | 7 | 0 | -12.062632 | -2.747705 | -0.302934 |
| 60 | 6 | 0 | 10.948226  | -2.396064 | 0.280208  |
| 61 | 7 | 0 | 12.053712  | -2.766654 | 0.301490  |
| 62 | 6 | 0 | 9.360660   | -0.709359 | 0.900897  |
| 63 | 7 | 0 | 9.181931   | 0.310124  | 1.439682  |

---
